# Supplementary material for: Haemosporidian Parasites of Antelopes and Other Vertebrates from Gabon, Central Africa
Source: PubMed Central journal article supplement (PMC4749209; doi:10.1371/journal.pone.0148958), 2016-02-10

**Table A. *Cyt-b* sequences of parasites recovered in this study and those used as references for phylogenetic analyses and their Genbank accession numbers.**

| Accession numbers | Isolates name                            | Host                           |
|-------------------|------------------------------------------|--------------------------------|
| HQ702482          | <i>Eimeria necatrix</i>                  | Fowl                           |
| HQ173882          | <i>Eimeria magna</i>                     | Rabbit                         |
| HQ173892          | <i>Eimeria vejvodskyi</i>                | Rabbit                         |
| AF023246          | <i>Toxoplasma gondii</i>                 | -                              |
| AY099053          | <i>P. giganteum</i>                      | Bird                           |
| AY099054          | <i>P. atheruri</i>                       | Rodent                         |
| AY099055          | <i>P. azurophilum</i>                    | Bird                           |
| AY733090          | <i>P. relictum</i>                       | Bird                           |
| DQ414658          | <i>P. yoelii_killicki</i>                | Rodent                         |
| FJ168561          | <i>Parahaemoproteus vireonis</i>         | bird                           |
| FJ168565          | <i>Hepaticystis_sp</i>                   | Bird                           |
| GQ141574          | <i>Plasmodium sp._bird_sp.12</i>         | Bird                           |
| GQ141581          | <i>Parahaemoproteus_sp._bird_sp.17</i>   | Bird                           |
| GQ141585          | <i>Parahaemoproteus_sp._bird_sp.19</i>   | Bird                           |
| GU252012          | <i>P. sp._GD2_GD201</i>                  | Bird                           |
| GU252027          | <i>Plasmodium sp._JA7_J725</i>           | Bird                           |
| AY099045          | <i>Haemoproteus majoris</i>              | Bird                           |
| HM222472          | <i>Haemoproteus_sp</i>                   | Bird                           |
| HM222485          | <i>Plasmodium_sp</i>                     | Bird                           |
| HM222486          | <i>Haemoproteus_sp</i>                   | Bird                           |
| HM222487          | <i>Haemoproteus_sp</i>                   | Bird                           |
| HQ712051          | <i>P. atheruri</i>                       | Rodent                         |
| JQ070884          | <i>Hepaticystis_sp._S2138</i>            | <i>C. nictitans</i>            |
| JQ070951          | <i>Hepaticystis_sp._AA-201_b-like</i>    | <i>C. nictitans</i>            |
| JQ070956          | <i>Hepaticystis_sp._AA-2012</i>          | <i>C. nictitans</i>            |
| JQ995287          | <i>Polychromophilus sp._LD-2012</i>      | Bat                            |
| KF049492          | <i>E15-Podocnemis expansa</i>            | Turtle                         |
| KF049495          | <i>E24-Podocnemis expansa</i>            | Turtle                         |
| KF049506          | <i>U65-Podocnemis unifilis</i>           | Turtle                         |
| KF159681          | <i>Polychromophilus sp._Min_vil_G3</i>   | Bat                            |
| KJ131277          | <i>Polychromophilus melanipherus</i>     | Bat                            |
| KF159699          | <i>Polychromophilus sp._Min_vil_G3_2</i> | Bat                            |
| HM055585          | <i>Polychromophilus murinus</i>          | Bat                            |
| KF159714          | <i>Polychromophilus sp._Pip_gran_G3</i>  |                                |
| KF159690          | <i>Nycteria sp._R_lan_G3_1</i>           | Bat                            |
| KF159700          | <i>Polychromophilus sp._Neo_cap_G3</i>   | Bat                            |
| KF159720          | <i>Nycteria sp._R_ale_C9_1</i>           | Bat                            |
| KJ700853          | <i>P. vinckei_isolate_1</i>              | Rodent                         |
| KJ700854          | <i>P. vinckei_isolate_2</i>              | Rodent                         |
| KM598212          | <i>P. sp._lineage_JA01</i>               | Bird                           |
| NC_012450         | <i>Leucocytozoon majoris</i>             | Bird                           |
| FJ168563          | <i>Leucocytozoon majoris</i>             | Bird                           |
| AY099063          | <i>Leucocytozoon dubreuli</i>            | Bird                           |
| AB299369          | <i>Leucocytozoon sabrazezi</i>           | Bird                           |
| AB302215          | <i>Leucocytozoon caulleryi</i>           | Bird                           |
| HM235081          | <i>P. adleri</i>                         | Gorilla                        |
| KP875474          | <i>P. billcollinsi</i>                   | Chimpanzee                     |
| HM235065          | <i>P. blacklocki</i>                     | gorilla                        |
| JF923762          | <i>P. praefalciparum</i>                 | <i>Cercopithecus nictitans</i> |
| FJ895307          | <i>P. gaboni</i>                         | Chimpanzee                     |
| JF923751          | <i>P. gonderi</i>                        | Mandrill                       |
| HM000110          | <i>P. malariae</i>                       | Chimpanzee                     |
| GU723548          | <i>P. ovale</i>                          | Human                          |
| KP875479          | <i>P. reichenowi</i>                     | Chimpanzee                     |
| JF923753          | <i>P. sp._DAJ-2004</i>                   | mandrill                       |

|           |                                  |             |
|-----------|----------------------------------|-------------|
| KF591834  | <i>P. vivax</i>                  | Human       |
| KF159674  | <i>P. cyclopsi</i>               | Bat         |
| KF159671  | <i>P. voltaicum</i>              | Bat         |
| AB444126  | <i>P. cynomolgi</i>              | -           |
| AF069612  | <i>P. gallinaceum</i>            | Bird        |
| JQ345504  | <i>P. knowlesi</i>               | Human       |
| NC_012447 | <i>Parahaemoproteus vireonis</i> | Vireogilvus |
| KT367840  | WN-622_Cephalophus monticola     | Antelope    |
| KT367833  | HO-13_Cephalophus monticola      | Antelope    |
| KT367822  | OL-122_Cephalophus monticola     | Antelope    |
| KT367835  | OM-449_Cephalophus monticola     | Antelope    |
| KT367828  | OL-100_Cephalophus monticola     | Antelope    |
| KT367830  | OL-131_Cephalophus callipygus    | Antelope    |
| KT367841  | NG-235_Cephalophus monticola     | Antelope    |
| KT367819  | HO-11_Cephalophus nigrifrons     | Antelope    |
| KT367839  | MO-309_Cephalophus monticola     | Antelope    |
| KT367851  | LOP_An._vinckei178               | Anophele    |
| KT367852  | LOP_An._gabonensis3              | Anophele    |
| KT367837  | OL-149_Cephalophus monticola     | Antelope    |
| KT367832  | OL-115-Cephalophus monticola     | Antelope    |
| KT367834  | MO-278_Cephalophus monticola     | Antelope    |
| KT367817  | OI-79_Cephalophus dorsalis       | Antelope    |
| KT367821  | NG-215_Cephalophus dorsalis      | Antelope    |
| KT367842  | OI-49_Cephalophus dorsalis       | Antelope    |
| KT367838  | NY-195_Cephalophus dorsalis      | Antelope    |
| KT367823  | OM-22_Cephalophus dorsalis       | Antelope    |
| KT367826  | OI-90_Cephalophus dorsalis       | Antelope    |
| KT367820  | OM-14_Cephalophus dorsalis       | Antelope    |
| KT367829  | WN-384_Cephalophus dorsalis      | Antelope    |
| KT367825  | NG-227_Cephalophus dorsalis      | Antelope    |
| KT367836  | HO-13_Cephalophus monticola      | Antelope    |
| KT367831  | OL-120_Cephalophus dorsalis      | Antelope    |
| KT367824  | OL-NG226_Cephalophus monticola   | Antelope    |
| KT367827  | HO-A6_Cephalophus monticola      | Antelope    |
| KT367818  | OI-52_Pangolin                   | Pangolin    |
| KT367865  | LOP_An._gabonensisSG279          | Anophele    |
| KT367853  | LOP_An._gabonensis279            | Anophele    |
| KT367855  | LEK_An._coustani1404             | Anophele    |
| KT367847  | LOP_An._carnevalei               | Anophele    |
| KT367860  | LEK_An._gabonensis               | Anophele    |
| KT367849  | LOP_An._obscurus78               | Anophele    |
| KT367863  | LOP_An._obscurusSG78             | Anophele    |
| KT367848  | LOP_An._obscurus2                | Anophele    |
| KT367850  | LOP_An._sp177                    | Anophele    |
| KT367861  | LEK_An._gabonensis2              | Anophele    |
| KT367854  | LEK_An._vinckei178               | Anophele    |
| KT367858  | LEK_An._marshallii1598           | Anophele    |
| KT367859  | LEK_An._moucheti1275             | Anophele    |
| KT367856  | LEK_An._coustani1338             | Anophele    |
| KT367864  | LEK_An._mouchetiSG1407           | Anophele    |
| KT367862  | LEK_An._marshalliiSG1682         | Anophele    |
| KT367857  | LEK_An._marshallii1682           | Anophele    |
| KT367846  | LEK_An._obscurus2                | Anophele    |
| KT367843  | HO-9_Kinixys erosa               | Turtle      |
| KT367844  | NG-238_Kinixys erosa             | Turtle      |
| KT367845  | NG-277_Ceratogymna atrata        | Bird        |

## Figure legend

### Figures

Phylogenetic relationships between the *Cyt-b* sequences obtained in our study (in brown) and reference sequences from existing databases. The trees were built based on 757 bp long cytochrome B (*Cyt-b*) sequences using Maximum Likelihood methods. Branch colors indicate different groups of vertebrates. A) the maximum likelihood tree was rooted using *Leucocytozoon* spp.. B) the tree was rooted using *Eimeria* spp. The names of our isolates include: 1) the abbreviation of the sampling site (LOP: La Lopé and LEK: Lékédi) or province (OL: Ogooue-Lolo; OM: Ogooue-Maritime, OI: Ogooue-Ivindo, NG: Ngounie; NY: Nyanga; HO: Haut-Ogooue; MO: Moyen-Ogooue; WN: Woleu-Ntem), 2) the sample number and 3) the name of the host species in which it was found (vertebrate host or anopheles) (for instance, OL115-*Cephalophus monticola*), 4) SG if the parasite was detected in the salivary glands (for anopheles only).

Figure A

Legend

-  Antelope
-  Monkey
-  Pangolin
-  Anopheles
-  Mammal parasites
-  Bird parasites
-  Reptile parasites

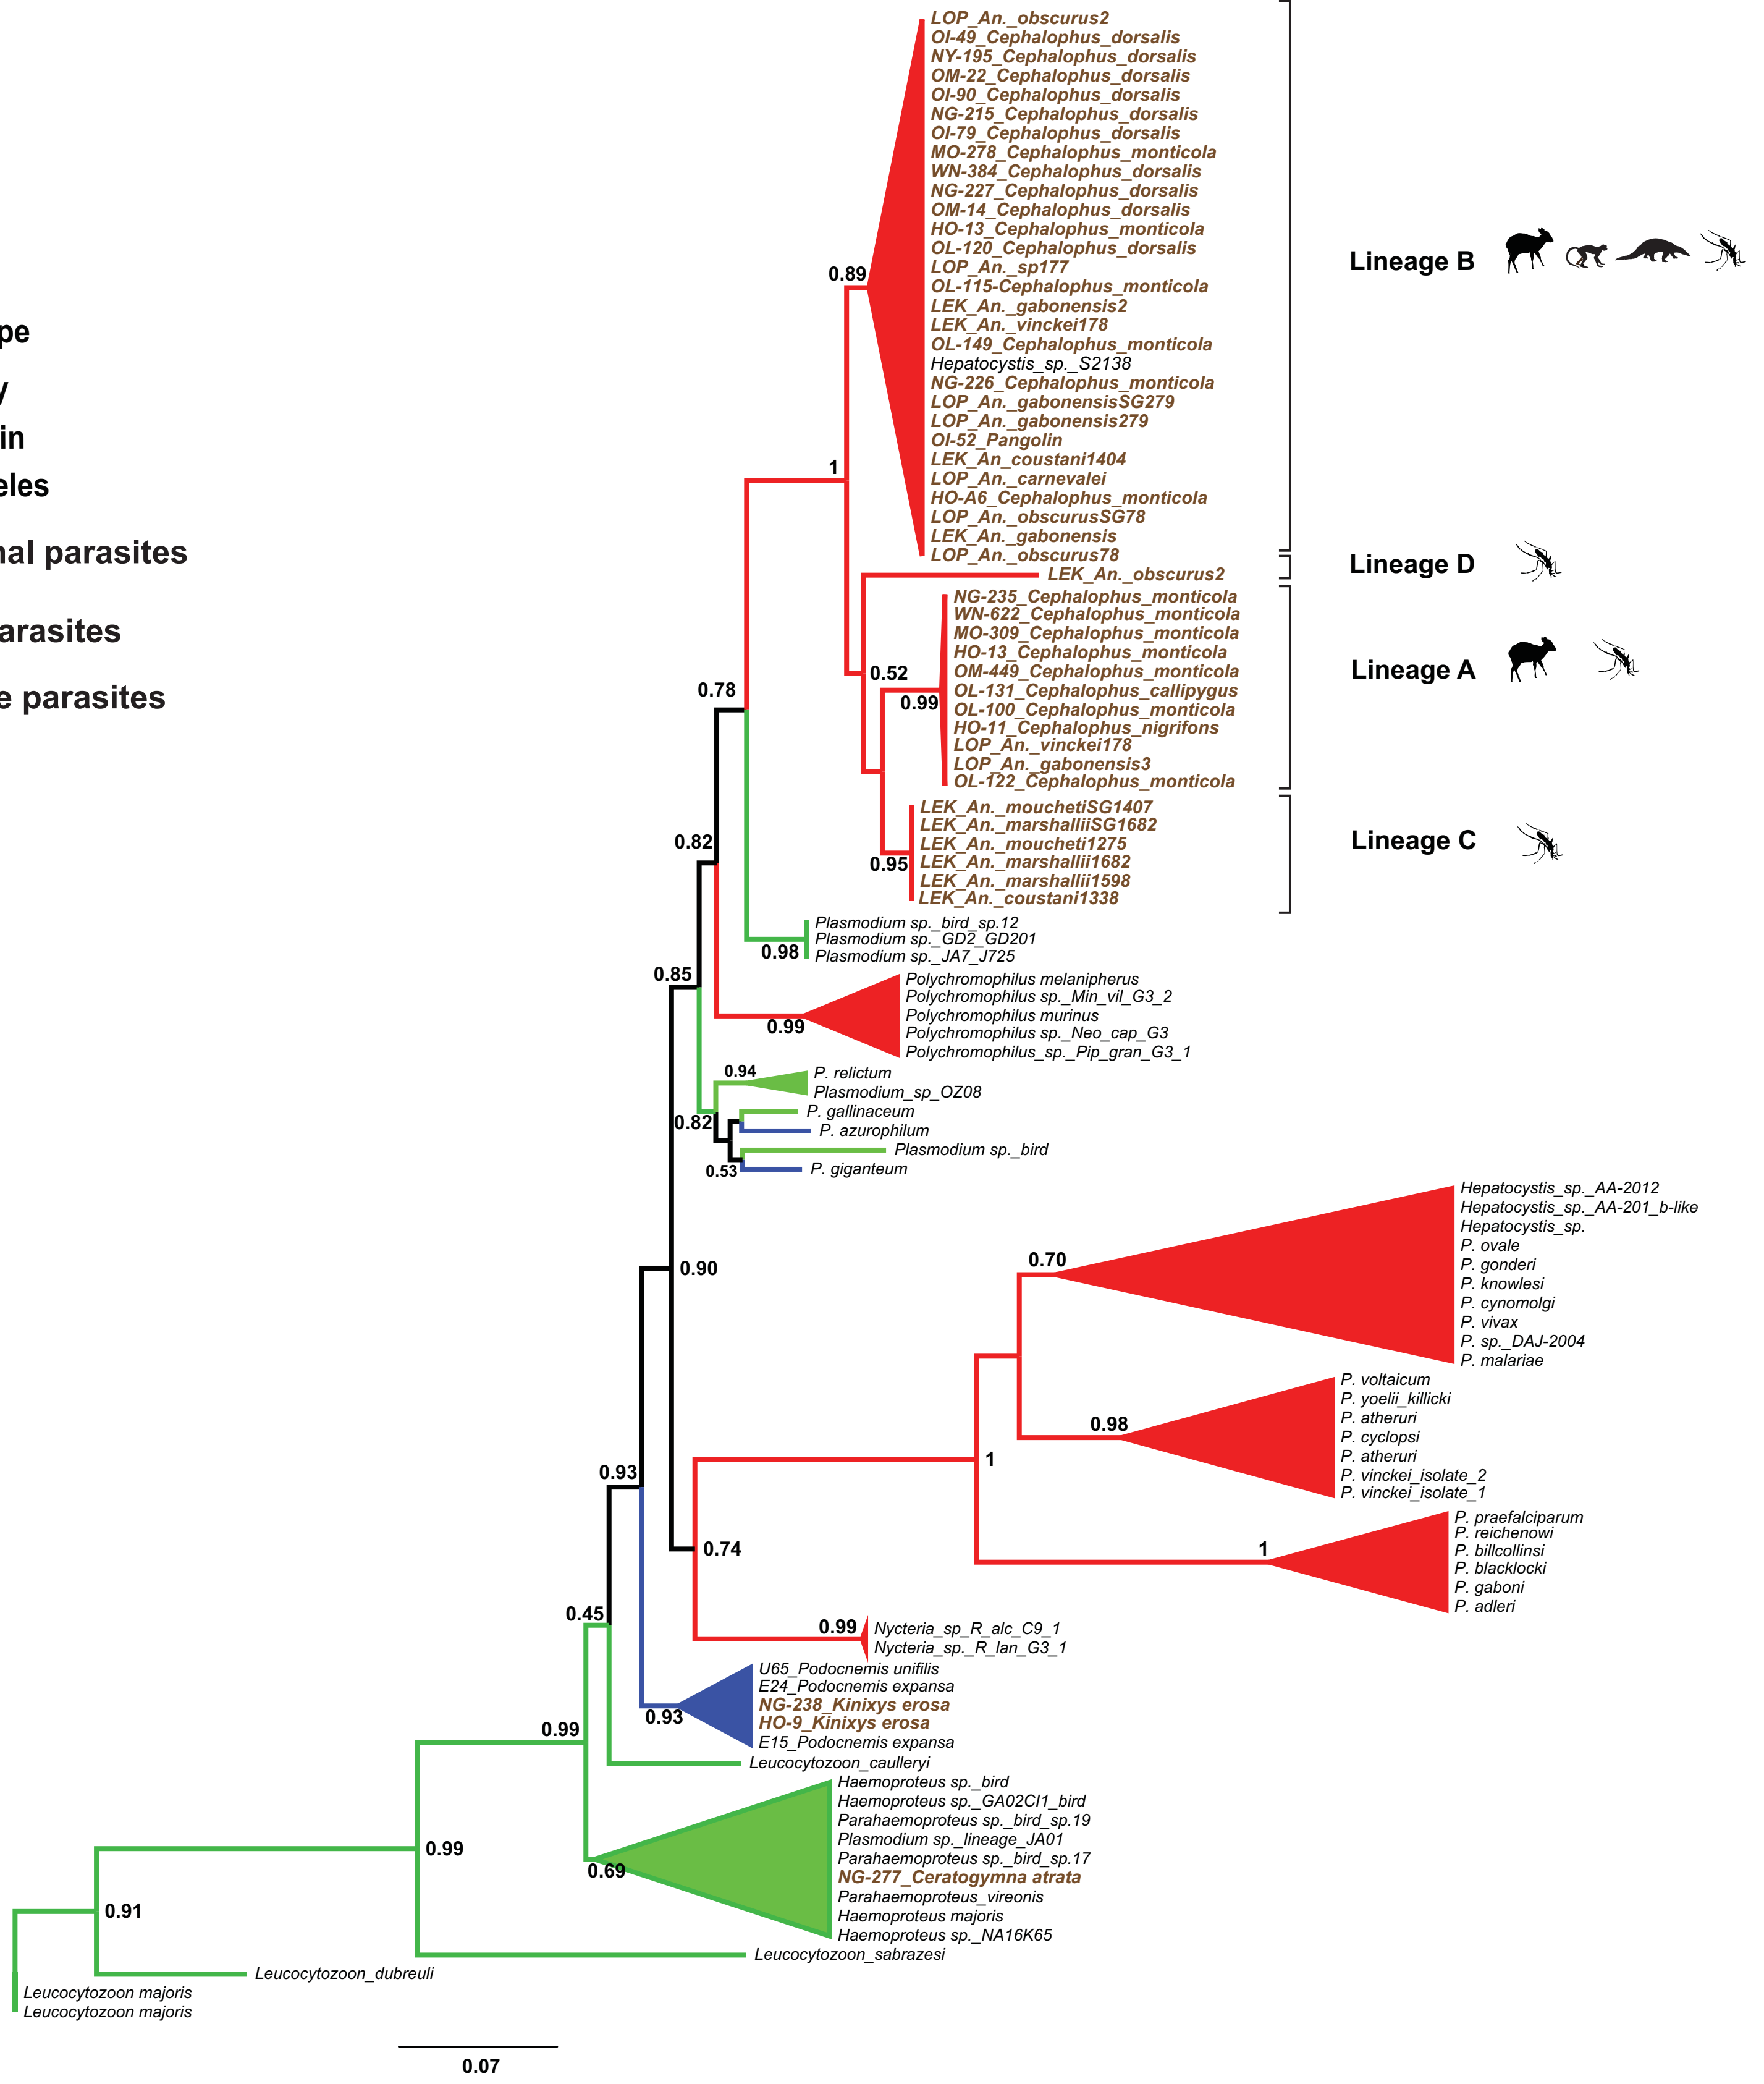

Figure B

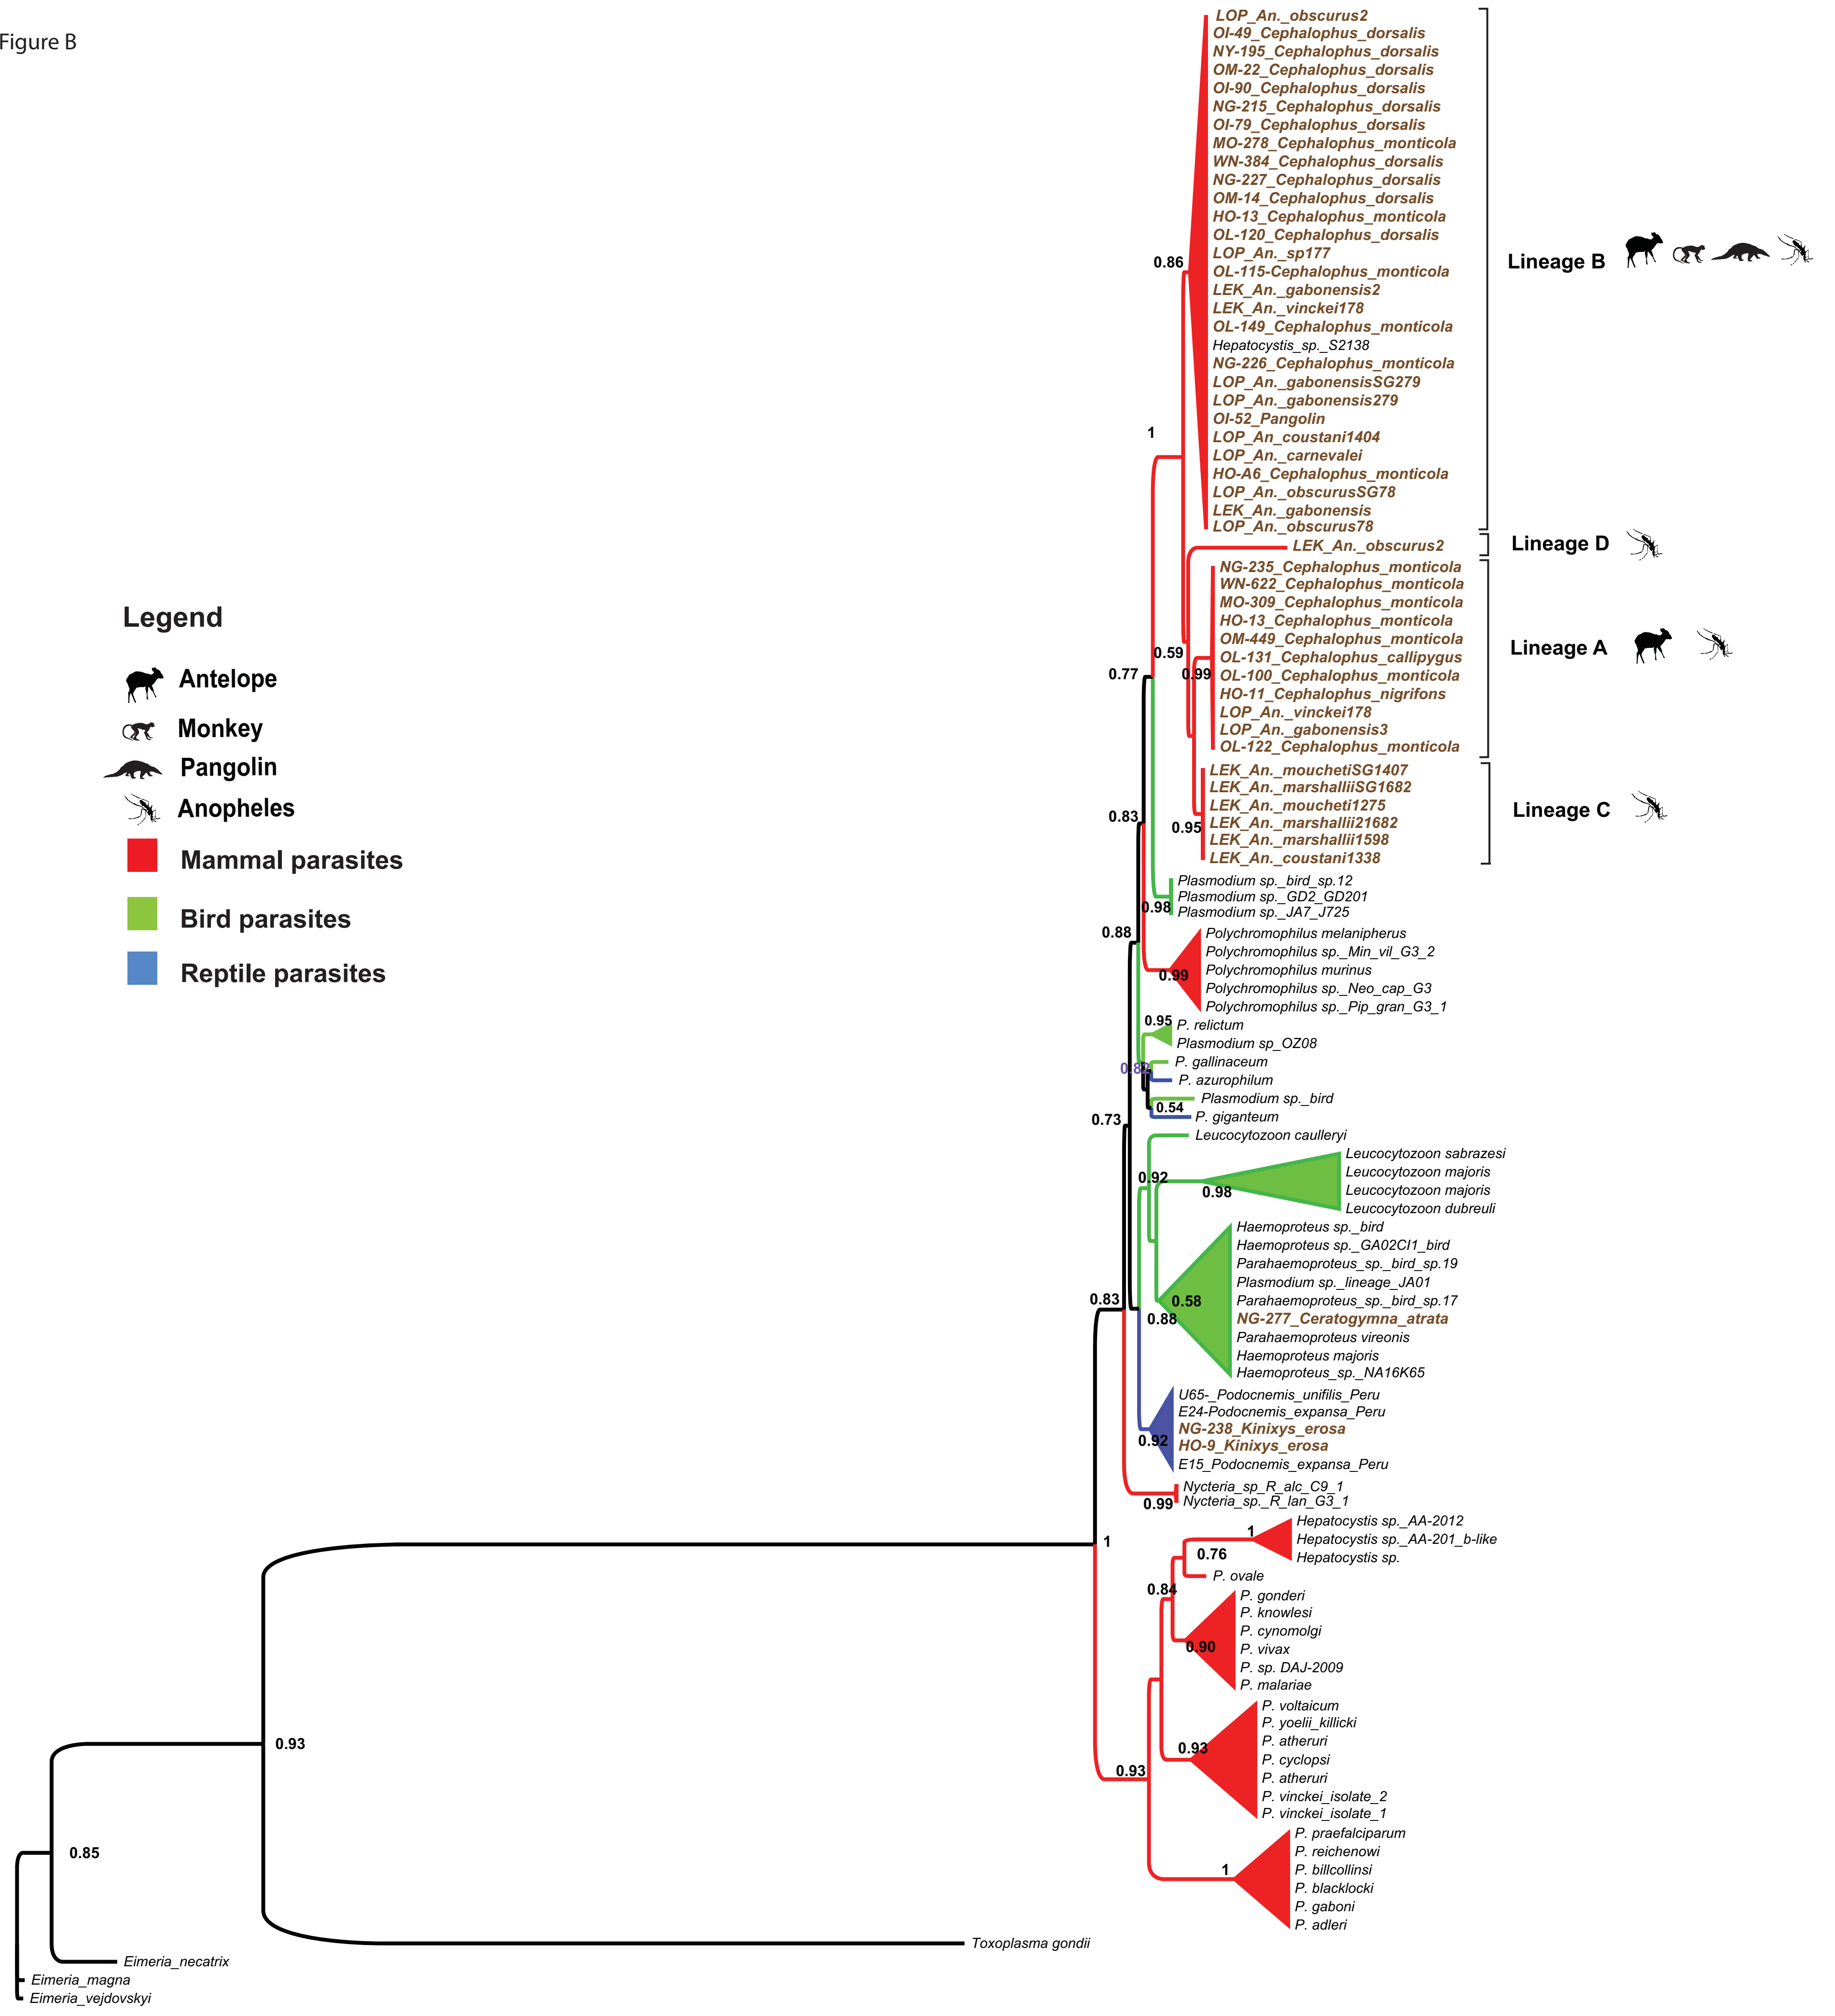

Supplement: pone.0148958.s001.pdf [file pone.0148958.s001.pdf]
